# Supplementary material for: Intervention Effect of Mindfulness Interventions Combined With Folk-Dance on Academic Burnout Among Left-Behind Children in Rural China
Source: Research Square preprint supplement (doi:10.21203/rs.3.rs-6576858/v1), 2025-08-22
Supplement: Supplementary file 1 [file 7d97c5236ab3b204e8f7a19b.xlsx]

## Sheet: Sheet1
NO.	Name	Group	Gender(male:1,female:2）	Age	Whether it is an only child(ture:1,no:2)	parental marital status(married:1,divorced:2,digamy:3,widowed:4)	parental outings(father outing:1,mother outing:2,parents outing：3）	parental frequency of returning home（once a week：1，once a month：2，once a year：3，twice a year：4）	Parents career（farm：1，work：2，Self-employed：3，other：4）	Household income（<five thousands：1，<thirty thousands：2，<eighty thousands：3，>eighty thousands：4）	Emotional Exhaustion(EE)1	EE2	EE3	EE4	EE5	EE6	EE7	EE8	T0	Emotional Exhaustion Scale 1	EE2	EE3	EE4	EE5	EE6	EE7	EE8	T1	Emotional Exhaustion Scale 1	EE2	EE3	EE4	EE5	EE6	EE7	EE8	T2	Physical Exhaustion(PE) 1	PE2	PE3	PE4	T0	Physical Exhaustion Scale 1	PE2	PE3	PE4	T1	Physical Exhaustion Scale 1	PE2
1	杨禄程	C	1	9	1	2	1	2	1	1	2	2	2	2	2	2	3	2	17	2	2	2	3	3	2	3	2	19	2	2	2	2	2	2	3	2	17	2	2	2	2	8	2	3	3	2	10	2	3
2	田梓涵	C	1	9	1	2	1	2	1	1	2	2	3	3	3	4	3	2	22	2	3	4	3	3	4	3	2	24	2	3	3	2	3	4	3	2	22	2	4	4	4	14	2	4	4	3	13	2	4
3	佘嘉兴	C	1	10	1	2	1	2	1	1	1	1	1	1	1	1	1	1	8	1	1	1	1	1	1	1	1	8	1	1	1	2	2	1	1	1	10	1	1	1	1	4	1	1	2	1	5	2	1
4	田鹏飞飞	C	1	10	1	2	1	4	1	2	5	2	4	2	2	2	1	2	20	5	4	4	2	2	2	1	2	22	5	4	4	2	2	2	1	2	22	2	2	2	2	8	2	2	2	2	8	2	2
5	王子宸	C	1	10	1	1	1	4	3	2	1	1	1	1	1	3	1	1	10	1	1	1	1	1	3	1	1	10	1	1	1	1	1	3	1	1	10	2	1	4	4	11	2	2	4	4	12	2	2
6	肖强	C	1	10	2	1	2	4	3	2	2	3	2	2	2	1	3	2	17	1	3	2	2	2	1	3	2	16	1	3	2	2	2	1	3	2	16	2	2	2	2	8	2	2	2	2	8	2	2
7	向秋宇	C	1	11	2	1	2	4	3	2	2	2	4	3	3	3	3	3	23	2	2	4	3	3	3	3	3	23	2	2	4	3	3	3	3	3	23	3	3	3	3	12	3	3	3	3	12	3	3
8	刘逸平	C	1	11	1	4	2	4	2	2	4	2	4	3	3	2	2	3	23	4	2	4	3	3	2	2	3	23	4	2	4	3	3	2	2	3	23	4	3	4	4	15	4	3	4	4	15	4	3
9	董书娴	C	1	11	1	1	2	3	2	2	2	2	2	2	2	2	2	2	16	2	2	2	2	2	2	2	2	16	2	2	2	2	2	2	2	2	16	1	2	1	2	6	1	2	1	2	6	1	2
10	雷皓轩	C	1	11	1	3	2	3	2	3	1	1	1	1	1	1	1	1	8	1	2	1	2	1	1	1	1	10	1	2	1	2	1	1	1	1	10	1	1	1	1	4	1	1	2	1	5	1	1
11	向自文	C	1	11	1	3	2	3	2	3	2	2	4	2	4	1	4	1	20	2	3	5	2	4	1	4	1	22	2	3	5	2	4	1	4	1	22	4	2	1	1	8	4	2	1	1	8	4	2
12	杨政佳	C	1	11	1	1	3	3	4	3	2	4	5	2	2	2	2	1	20	2	4	5	2	2	2	2	1	20	2	4	5	2	2	2	2	1	20	4	4	2	4	14	4	4	2	4	14	4	4
13	李娜	C	2	11	1	1	3	3	4	3	2	2	2	2	2	2	2	2	16	2	2	2	2	2	2	2	2	16	2	2	2	2	2	2	2	2	16	5	2	2	2	11	5	2	2	2	11	5	2
14	余河凤	C	2	10	1	1	3	3	2	3	2	2	4	3	2	2	2	2	19	2	2	4	3	2	3	2	2	20	2	2	4	3	2	3	2	2	20	2	4	3	2	11	2	4	3	2	11	2	3
15	丁雨薇	C	2	11	1	1	3	3	2	3	2	1	3	1	1	2	2	2	14	2	1	3	1	1	2	2	2	14	2	1	3	1	1	2	2	2	14	4	3	1	2	10	4	3	1	2	10	3	3
16	张可	C	2	11	2	1	3	3	2	3	3	4	4	2	2	4	5	4	28	3	4	4	2	3	5	5	4	30	3	4	4	2	3	5	5	4	30	3	2	3	2	10	3	2	3	2	10	2	2
17	侯泽宇	C	2	11	2	1	1	3	2	4	1	1	5	1	1	1	1	1	12	1	1	5	1	1	1	1	1	12	1	1	5	1	1	1	1	1	12	3	1	1	4	9	3	1	1	4	9	3	1
18	吴晨羲	C	2	11	2	1	1	3	2	4	2	1	4	2	4	3	4	1	21	2	1	3	2	4	3	4	1	20	2	1	3	2	4	3	4	1	20	3	3	4	2	12	3	3	4	2	12	3	2
19	徐子博	C	2	11	2	1	1	3	2	3	4	4	4	1	4	4	2	4	27	4	4	5	3	4	4	2	4	30	3	3	4	3	4	4	2	4	27	4	4	1	4	13	4	4	1	4	13	4	4
20	董欣怡	C	2	12	2	1	1	1	2	3	3	3	4	1	3	3	2	3	22	3	3	4	1	3	3	2	3	22	3	3	4	1	3	3	2	3	22	2	3	2	3	10	2	3	2	3	10	2	3
21	钱璐	C	2	10	2	1	1	1	2	3	3	3	4	2	2	4	3	3	24	3	3	4	3	3	4	3	3	26	3	3	4	3	3	4	3	3	26	2	3	4	3	12	2	3	4	3	12	2	3
22	赵鸿睿	C	1	9	1	1	1	4	1	1	1	1	1	1	1	1	1	1	8	1	1	1	1	1	1	1	1	8	1	1	1	2	2	1	1	1	10	1	1	1	1	4	1	1	1	1	4	1	1
23	舒宇轩	C	1	10	1	1	3	2	2	2	3	2	4	2	3	3	3	3	23	3	2	4	2	4	4	3	4	26	3	1	3	2	4	4	3	4	24	4	3	3	4	14	4	3	3	4	14	4	4
24	杨桓	C	2	11	2	2	2	1	3	3	5	5	5	4	4	4	4	4	35	5	5	5	4	4	4	4	4	35	5	5	5	4	4	4	4	4	35	5	5	4	4	18	5	5	4	4	18	5	5
25	张艺馨	C	2	12	2	2	2	3	4	4	4	4	5	4	5	5	5	5	37	4	5	5	4	5	5	5	5	38	4	4	4	4	5	5	5	5	36	5	5	3	5	18	5	5	4	5	19	5	5
26	肖虹	D	2	10	1	1	1	3	1	1	1	1	1	1	1	1	1	1	8	1	1	1	1	1	1	1	1	8	1	1	1	1	1	1	1	1	8	1	1	1	1	4	1	1	1	1	4	1	1
27	张文贤	D	2	10	1	1	1	2	1	1	3	2	2	2	2	1	2	1	15	1	1	1	2	1	1	2	1	10	1	1	1	2	1	1	2	1	10	5	5	5	1	16	5	2	2	1	10	5	2
28	杨珺朗	D	2	10	1	1	1	2	1	2	2	3	4	3	3	3	2	3	23	1	2	2	1	2	2	1	3	14	1	2	2	1	2	2	1	3	14	3	3	2	3	11	2	2	2	1	7	2	2
29	陈相玉	D	2	10	1	2	1	2	2	2	2	2	2	2	2	1	2	2	15	1	1	1	1	2	1	2	2	11	1	1	1	1	2	1	2	2	11	3	1	2	3	9	1	1	2	2	6	1	1
30	周荣	D	2	10	1	2	1	1	2	2	3	2	3	2	2	2	3	2	19	1	1	2	1	1	1	3	2	12	1	1	2	1	1	1	3	2	12	4	4	3	4	15	2	2	2	4	10	2	1
31	张邦安	D	2	10	1	2	1	1	2	2	3	2	3	2	2	3	2	2	19	1	2	1	1	1	2	2	1	11	1	2	1	1	1	2	2	1	11	2	2	3	4	11	2	2	1	1	6	2	1
32	王梓旭	D	2	9	2	2	2	3	2	2	4	4	4	1	2	2	2	2	21	2	3	1	1	1	1	2	2	13	2	2	1	1	1	1	2	2	12	4	4	2	2	12	2	2	1	1	6	1	2
33	刘珍蓉	D	2	9	2	2	2	3	4	2	2	2	2	2	2	2	2	2	16	1	1	1	1	2	2	1	2	11	1	1	1	1	2	2	1	2	11	2	2	2	2	8	1	1	1	1	4	1	1
34	胡慧林	D	2	9	2	3	2	3	2	2	2	2	2	2	2	2	2	2	16	2	1	1	1	1	1	2	2	11	2	1	1	1	1	1	2	2	11	2	2	2	2	8	1	1	1	1	4	1	1
35	包湘语	D	1	9	2	3	2	3	2	3	3	3	3	3	3	3	3	3	24	1	1	3	2	2	2	2	3	16	1	1	3	2	2	2	2	3	16	3	3	3	3	12	1	2	2	1	6	1	2
36	唐彬城	D	1	12	2	1	2	4	2	3	2	2	3	2	3	2	2	1	17	1	1	1	2	3	1	1	1	11	1	1	1	2	3	1	1	1	11	2	3	2	3	10	1	2	1	2	6	1	2
37	石熙	D	1	9	2	1	1	4	3	3	5	1	4	2	2	3	4	3	24	2	1	3	1	1	2	4	1	15	2	1	3	1	1	2	4	1	15	5	4	2	1	12	3	3	1	1	8	3	3
38	彭绎如	D	1	11	1	4	1	4	3	3	1	1	5	2	4	1	2	1	17	1	1	2	1	4	1	2	1	13	1	1	2	1	4	1	2	1	13	4	3	2	1	10	3	1	1	1	6	3	1
39	张雅欣	D	1	11	2	1	3	4	3	3	3	3	3	3	3	3	3	3	24	1	3	2	2	1	2	2	3	16	1	3	2	2	1	2	2	3	16	3	3	3	3	12	3	1	1	1	6	3	1
40	唐涵菲	D	1	11	1	1	3	4	2	3	2	1	3	1	1	1	1	1	11	2	1	3	1	1	1	1	1	11	2	1	2	1	1	1	1	1	10	2	1	4	3	10	1	1	2	1	5	1	1
41	周文博	D	1	11	2	1	3	3	2	3	2	3	4	3	2	2	3	2	21	1	1	2	3	1	1	3	2	14	1	1	2	3	1	1	3	2	14	3	2	4	2	11	1	1	3	1	6	1	1
42	肖韵佳	D	1	11	1	1	3	3	2	3	2	1	5	3	4	1	1	1	18	1	1	3	2	3	1	1	1	13	1	1	3	2	3	1	1	1	13	1	3	5	1	10	1	1	2	1	5	1	1
43	李妍	D	1	11	1	1	3	3	2	3	1	1	4	2	2	1	4	1	16	1	1	2	1	1	1	2	1	10	1	1	2	1	1	1	2	1	10	3	2	4	4	13	2	1	3	1	7	2	1
44	曾渝	D	1	11	1	1	3	3	2	4	4	4	4	3	3	4	4	4	30	2	2	3	2	1	3	1	4	18	2	2	3	2	1	3	1	3	17	4	4	4	4	16	2	2	2	4	10	2	2
45	潘瑾萱	D	1	11	1	1	1	3	2	4	1	5	1	1	1	5	1	1	16	1	3	1	1	1	1	1	1	10	1	2	1	1	1	1	1	1	9	2	2	2	2	8	1	1	2	1	5	1	1
46	刘怡	D	2	10	1	1	2	2	1	3	1	1	2	1	1	1	1	1	9	1	1	1	1	1	1	1	1	8	1	1	1	1	1	1	1	1	8	4	1	5	4	14	2	1	4	2	9	2	1
47	杨峻熙	D	1		2	1	3	4	1	2	2	2	4	2	2	2	3	1	18	1	1	3	1	1	1	1	1	10	1	1	3	1	1	1	1	1	10	4	3	2	2	11	2	2	1	2	7	2	2
48	吴城涛	D	1	10	1	2	2	1	3	3	1	1	1	1	1	1	1	1	8	1	1	1	1	1	1	1	1	8	1	1	1	1	1	1	1	1	8	1	1	1	1	4	1	1	1	1	4	1	1
49	杨岭巍	D	2	11	1	3	2	2	2	4	1	1	1	1	1	1	1	1	8	1	1	1	1	1	1	1	1	8	1	1	1	1	1	1	1	1	8	1	1	1	1	4	1	1	1	1	4	1	1
50	梁芷涵	D	2	12	2	1	1	3	1	1	3	2	5	3	4	2	3	3	25	1	1	3	2	2	2	2	3	16	1	1	3	2	1	1	1	2	12	2	4	4	3	13	1	3	2	1	7	1	3
51	罗嘉俊	M	2	10	1	1	2	2	1	3	3	3	4	3	3	3	4	3	26	1	2	3	1	3	3	4	3	20	1	2	3	1	3	3	4	3	20	3	2	2	2	9	2	1	1	2	6	2	1
52	夏志波	M	2	10	1	2	2	2	1	1	1	1	1	1	1	1	1	1	8	1	1	1	1	1	1	1	1	8	1	1	1	1	1	1	1	1	8	1	1	1	1	4	1	1	1	1	4	1	1
53	张莉莉	M	2	10	1	2	2	4	1	1	2	2	4	3	3	2	4	4	24	2	2	2	2	3	2	3	4	20	2	2	2	2	3	2	3	4	20	3	3	4	4	14	2	2	3	3	10	2	2
54	段昭辉	M	2	10	1	2	2	4	1	3	5	5	5	5	5	5	5	5	40	3	5	3	5	4	5	5	5	35	3	3	3	4	4	5	5	5	32	5	5	5	5	20	4	4	4	4	16	4	4
55	胡睿	M	2	10	1	2	1	4	2	3	1	1	1	1	1	1	1	1	8	1	1	1	1	1	1	1	1	8	1	1	1	1	1	1	1	1	8	1	1	4	3	9	1	1	3	1	6	1	1
56	包湘语	M	2	11	2	3	1	4	4	3	1	2	3	3	3	3	3	3	21	1	1	1	3	1	3	3	3	16	1	1	1	3	1	3	3	3	16	3	3	3	4	13	2	2	3	2	9	2	2
57	夏诗妍	M	2	11	2	1	1	4	2	3	2	2	3	3	2	2	2	2	18	1	1	2	2	2	2	2	2	14	1	1	2	2	2	2	2	2	14	4	3	2	1	10	3	1	1	1	6	2	1
58	舒曼琪	M	2	11	2	1	1	4	2	3	2	1	5	2	4	2	3	4	23	1	1	3	2	1	2	3	4	17	1	1	3	2	1	2	3	4	17	5	4	4	4	17	4	2	2	2	10	4	2
59	李知霖	M	2	11	1	1	1	3	3	2	2	2	1	1	4	1	1	1	13	1	1	1	1	3	1	1	1	10	1	1	1	1	3	1	1	1	10	1	1	2	1	5	1	1	2	1	5	1	1
60	杨燕霓	M	2	11	2	1	1	3	3	2	2	1	4	3	3	2	2	3	20	1	1	3	1	2	2	2	3	15	1	1	3	1	2	2	2	3	15	3	4	2	1	10	2	3	1	1	7	2	1
61	向红玉	M	1	11	1	2	1	3	2	2	5	4	1	5	5	5	4	5	34	1	4	1	4	4	4	4	5	27	1	4	1	4	4	4	4	5	27	5	5	5	5	20	3	3	4	5	15	3	3
62	易乐萱	M	1	10	2	1	1	1	2	2	2	2	3	2	2	4	4	4	23	2	2	3	2	2	2	2	2	17	2	1	3	2	1	2	2	2	15	2	2	2	3	9	2	2	2	2	8	2	2
63	肖杨钰珺	M	1	10	1	1	1	1	2	2	3	1	4	3	5	3	2	2	23	1	1	1	2	4	3	2	2	16	1	1	1	2	3	3	2	2	15	2	3	2	3	10	2	3	2	2	9	2	3
64	周哲浩	M	1	9	2	1	1	3	2	2	3	1	3	3	2	3	1	1	17	1	1	1	3	2	3	1	1	13	1	1	1	3	2	3	1	1	13	4	3	3	2	12	3	2	3	2	10	3	2
65	杨子怡	M	1	10	1	1	1	3	2	3	1	1	4	1	1	2	1	1	12	1	1	3	1	1	1	1	1	10	1	1	3	1	1	1	1	1	10	4	4	3	5	16	3	3	3	3	12	3	3
66	彭一峰	M	1	9	1	4	3	3	2	3	2	1	5	2	4	1	3	1	19	1	1	3	1	3	1	2	1	13	1	1	3	1	3	1	2	1	13	5	4	1	3	13	4	2	1	3	10	4	2
67	舒雨雪	M	1	9	1	1	3	3	2	3	2	3	5	3	3	1	2	3	22	1	2	3	2	2	1	1	3	15	1	2	3	2	2	1	1	3	15	4	3	4	5	16	2	2	3	4	11	2	2
68	张峻豪	M	1	9	1	1	3	3	2	3	1	1	2	1	1	1	1	1	9	1	1	1	1	1	1	1	1	8	1	1	1	1	1	1	1	1	8	2	1	1	4	8	2	1	1	3	7	1	1
69	杨淑帆	M	1	9	1	1	3	3	2	3	1	1	1	1	1	1	1	1	8	1	1	1	1	1	1	1	1	8	1	1	1	1	1	1	1	1	8	1	1	1	1	4	1	1	1	1	4	1	1
70	唐诗涵	M	1	12	1	1	1	3	2	4	1	1	3	1	3	1	2	1	13	1	1	1	1	2	1	1	1	9	1	1	1	1	2	1	1	1	9	2	1	3	1	7	1	1	2	1	5	1	1
71	向丽瑶	M	1	11	1	1	1	3	2	3	2	2	2	2	2	1	1	1	13	1	1	2	1	2	1	1	1	10	1	1	2	1	2	1	1	1	10	2	2	2	2	8	1	1	2	2	6	1	1
72	杨欣怡	M	1	9	1	1	2	4	1	3	3	2	5	4	3	4	4	4	29	1	1	3	1	3	2	2	4	17	1	1	3	1	3	2	2	4	17	3	4	5	3	15	2	2	3	2	9	2	2
73	尹皓冬	M	1	10	1	2	3	3	1	3	5	4	4	4	4	4	2	4	31	2	4	2	4	2	3	2	4	23	2	3	2	3	2	3	2	4	21	2	4	2	2	10	2	3	1	1	7	2	3
74	邓泳帆	M	2	11	2	3	1	2	2	2	3	4	4	4	3	1	2	3	24	1	2	2	4	3	1	2	3	18	1	2	1	3	3	1	2	3	16	4	3	3	5	15	2	1	2	5	10	2	1
75	章瑾轩	M	2	12	2	4	2	3	3	1	3	1	2	2	3	1	2	1	15	1	1	1	2	3	1	2	1	12	1	1	1	2	3	1	2	1	12	4	1	2	2	9	2	1	2	2	7	2	1
76	夏之星	MD	1	11	1	1	1	3	2	3	3	1	1	3	3	2	1	5	19	1	1	1	1	1	2	1	1	9	1	1	1	1	1	1	1	1	8	2	3	3	3	11	1	1	2	2	6	1	1
77	李错	MD	1	11	1	1	1	2	2	1	2	1	4	1	2	2	2	3	17	1	1	1	1	1	1	1	1	8	1	1	1	1	1	1	1	1	8	4	4	4	3	15	2	2	3	2	9	1	2
78	李红漪	MD	1	11	1	2	1	2	1	1	3	2	5	4	3	4	4	4	29	1	1	3	2	1	4	1	1	14	1	1	1	1	1	3	1	1	10	3	4	5	3	15	1	2	3	2	8	1	1
79	陈佳斌	MD	1	11	1	1	1	3	1	1	3	2	4	3	3	3	1	2	21	1	2	2	2	1	1	1	2	12	1	1	1	1	1	1	1	2	9	2	3	3	2	10	1	2	1	1	5	1	1
80	雷佳	MD	1	11	1	2	1	3	1	3	1	1	1	1	1	1	1	1	8	1	1	1	1	1	1	1	1	8	1	1	1	1	1	1	1	1	8	1	1	1	1	4	1	1	1	1	4	1	1
81	彭兴华	MD	1	11	1	2	2	3	1	3	2	2	4	3	3	1	3	2	20	1	1	2	2	2	1	2	1	12	1	1	1	1	2	1	1	1	9	3	3	2	2	10	1	1	1	1	4	1	1
82	廖欣颐	MD	1	11	1	2	2	3	2	2	2	1	4	2	4	1	2	3	19	1	1	2	1	3	1	1	1	11	1	1	1	1	2	1	1	1	9	3	2	1	4	10	1	1	1	2	5	1	1
83	石佳骏	MD	1	10	1	2	2	1	2	2	2	1	4	2	3	3	2	2	19	1	1	2	1	3	1	1	1	11	1	1	1	1	2	1	1	1	9	1	4	4	4	13	1	2	2	2	7	1	1
84	肖程祥	MD	1	10	1	1	2	1	2	2	3	2	2	2	3	2	3	3	20	1	1	1	1	3	1	2	2	12	1	1	1	1	2	1	1	1	9	2	2	3	3	10	1	1	1	1	4	1	1
85	余杭隆	MD	1	10	1	1	1	3	2	2	4	5	5	4	4	5	5	5	37	1	2	2	1	4	3	3	3	19	1	1	1	1	3	3	2	2	14	5	5	4	4	18	3	3	2	2	10	2	1
86	陈颖	MD	1	10	2	1	1	3	2	2	2	2	4	5	5	5	5	5	33	1	1	2	1	3	3	3	3	17	1	1	1	1	2	2	2	2	12	3	4	5	5	17	1	2	4	3	10	1	1
87	丁俊杰	MD	1	10	1	3	1	3	3	2	3	2	3	2	3	2	2	2	19	2	1	1	1	1	1	1	1	9	1	1	1	1	1	1	1	1	8	4	4	2	4	14	2	1	1	2	6	1	1
88	李浩泽	MD	2	10	1	3	1	3	3	4	1	1	1	1	1	1	1	1	8	1	1	1	1	1	1	1	1	8	1	1	1	1	1	1	1	1	8	1	1	1	1	4	1	1	1	1	4	1	1
89	段李萱	MD	2	10	2	1	1	3	4	4	3	3	3	5	5	1	5	4	29	1	1	2	2	3	1	3	2	15	1	1	1	1	2	1	2	1	10	1	1	5	5	12	1	1	1	2	5	1	1
90	杨璨如	MD	2	10	1	1	1	3	4	3	2	2	3	3	3	3	3	2	21	1	1	2	2	2	1	3	2	14	1	1	1	1	1	1	2	1	9	1	4	3	3	11	1	1	1	1	4	1	1
91	向晨	MD	2	13	2	1	3	3	2	3	4	2	3	2	4	4	3	3	25	1	1	2	2	2	1	3	3	14	1	1	2	1	1	1	1	2	10	2	5	4	4	15	1	3	2	1	7	1	1
92	张宁	MD	2	11	1	1	3	3	2	3	2	4	4	2	3	3	4	2	24	1	2	1	2	2	1	2	2	14	1	2	1	2	1	1	1	1	10	3	2	3	4	12	1	1	1	3	6	1	1
93	米涛	MD	2	12	2	4	3	4	2	3	2	2	3	3	3	2	2	3	20	1	1	2	1	2	1	1	2	11	1	1	1	1	1	1	1	1	8	5	3	2	3	13	3	1	1	2	7	1	1
94	卢韵冰	MD	2	12	2	1	3	4	2	3	2	1	4	1	2	1	2	1	14	1	1	2	1	1	1	1	1	9	1	1	1	1	1	1	1	1	8	1	3	1	3	8	1	2	1	1	5	1	1
95	谢雅琪	MD	2	9	2	4	3	4	2	3	2	1	3	2	4	2	2	2	18	1	1	1	1	3	1	1	1	10	1	1	1	1	1	1	1	1	8	3	3	3	2	11	1	2	2	1	6	1	1
96	肖抒晴	MD	2	9	2	1	3	4	2	3	1	1	1	1	1	1	1	1	8	1	1	1	1	1	1	1	1	8	1	1	1	1	1	1	1	1	8	1	1	1	1	4	1	1	1	1	4	1	1
97	彭祖暄	MD	1	9	1	1	1	4	1	3	3	2	3	3	2	2	2	2	19	1	1	1	1	2	1	1	1	9	1	1	1	1	1	1	1	1	8	2	3	2	2	9	1	2	1	1	5	1	1
98	刘蔚	MD	1	10	1	2	1	3	1	2	2	2	2	2	2	2	2	1	15	1	1	2	1	2	1	1	1	10	1	1	1	1	1	1	1	1	8	2	1	2	2	7	1	1	1	1	4	1	1
99	丁安琪	MD	2	11	2	3	1	1	2	1	2	2	1	2	2	2	2	2	15	1	1	1	1	1	2	2	2	11	1	1	1	1	1	1	1	1	8	3	2	2	2	9	2	2	1	1	6	1	1
100	梁琪敏	MD	2	12	2	2	1	2	3	1	1	1	5	3	1	1	1	1	14	1	1	2	1	1	1	1	1	9	1	1	1	1	1	1	1	1	8	2	3	2	2	9	1	1	2	1	5	1	1
[truncated: 39 more columns]
